# Supplementary material
Source: publisher figshare collection journal article supplement (https://acs.figshare.com/ndownloader/files/5149795)
Supplement: Supplementary file 1 [file 5149795]

(Supporting Information)

## **Nonracemic Dopant-Mediated Hierarchical Amplification of Macromolecular Helicity in a Charged Polyacetylene Leading to a Cholesteric Liquid Crystal in Water**

Katsuhiko Maeda,<sup>†</sup> Yoshihisa Takeyama,<sup>†</sup> Koichi Sakajiri,<sup>‡</sup> and Eiji Yashima<sup>\*,†,‡</sup>

<sup>†</sup>*Department of Molecular Design and Engineering, Graduate School of Engineering, Nagoya University, Chikusa-ku, Nagoya 464-8603, Japan, and*  
<sup>‡</sup>*Yashima Super-structured Helix Project, ERATO, Japan Science and Technology Agency (JST), 101 Creation Core Nagoya, 2266-22 Moriyama-ku, Nagoya 463-0003, Japan*

### **Experimental Section**

**Materials.** Deionized distilled water was used in all the experiments. (*S*)- and (*R*)-**2** were prepared by the reaction of (*S*)- and (*R*)-phenyl lactic acids (Aldrich) with aqueous NaOH. The stereoregular *cis-transoidal* poly-**1** was prepared by the polymerization of the corresponding monomer with a rhodium catalyst according to the previously reported method.<sup>1,2</sup> The resulting polymer was quantitatively converted to its HCl salt with aqueous HCl, followed by precipitation into acetone; its number average molecular weight was  $3.4 \times 10^5$  ( $M_w/M_n = 2.21$ ) as determined by size exclusion chromatography (SEC). The stereoregularity was confirmed to be *cis-transoidal* based on the <sup>1</sup>H NMR and Raman spectroscopies.<sup>1,2</sup>

**Instruments.** <sup>1</sup>H NMR spectra were taken using a Varian VXR-500S spectrometer operating at 500 MHz for <sup>1</sup>H. The Raman spectrum was taken on a Jasco RMP-CT200. An SEC measurement was performed with a Jasco PU-980 liquid chromatograph (Jasco) equipped with a RI (256 nm; Jasco RI-930) detector. A Tosoh TSK-GEL SUPER AWM-H column was connected and a water solution containing 9 mM tartaric acid and the 0.1 mM tartaric acid sodium salt was used as the eluent at a flow rate of 0.6 mL/min.

The molecular weight calibration curve was obtained with poly(ethylene oxide) and poly(ethylene glycol) standards.

**Absorption and CD Measurements in Dilute Solution.** All absorption (Jasco V-570, Hachioji, Japan) and CD (Jasco J-725) spectra were measured in water in a 1.0-mm quartz cell at ambient temperature (20–25 °C). The concentration of poly-**1**-HCl was calculated on the basis of the monomer units and was 1.0 mg/mL in dilute solution. The molar ratio of (*S*)- or (*R*)-**2** to the monomer units of poly-**1**-HCl was 0.5 (Figure. S-1) and 0.1 (Figure 2B, inset). The CD titration experiments were carried out as follows. A stock solution of poly-**1**-HCl (2.0 mg/mL) in water was prepared in a 5-mL flask equipped with a stopcock. Stock solutions of (*S*)-**2** (7.94, 1.99, 0.40 and 0.20 mM) in water were also prepared in 5-, 25- and two 100-mL flasks, respectively. The 0.50 mL aliquots of the poly-**1**-HCl solution were transferred to thirteen 1-mL flasks equipped with stopcocks. Increasing amounts of the stock solution of the (*S*)-**2** were added to the flasks; the molar ratios of (*S*)-**2** to poly-**1**-HCl were 0.001, 0.002, 0.005 (0.20 mM (*S*)-**2** was used), 0.01, 0.02, 0.03 (0.40 mM (*S*)-**2**), 0.05 and 0.1 (1.99 mM (*S*)-**2**) and 0.2, 0.3, 0.5, 5.0, 10 (7.94 mM (*S*)-**2**), and the resulting solutions were diluted with water to maintain the poly-**1**-HCl concentrations at 1.0 mg/mL (4.0 mM). The absorption and CD spectra were then taken for each flask to determine the changes in the CD spectra (Figure 2A, inset). The association constant (*K*) was obtained according to the Hill equation,  $\log(Y/(1-Y)) = n\log[G] + n\log K$ , where *Y*, *n*, [*G*] and *K* represent the fractional saturation, the Hill coefficient, the concentration of the guest and the association constant, respectively.<sup>3</sup> The Hill plot gave a satisfactory linear fit (correlation coefficient > 0.99) with  $K = 1.9 \times 10^4$  (M<sup>-1</sup>) and *n* = 1.20. The changes in

the ICD intensity of poly-**1**-HCl with respect to the ee of **2** ( $5\% < ee < 100\%$ , nonlinear effects) were investigated as follows. The molar ratio of **2** to the monomer units of poly-**1**-HCl was held constant at 0.1. Stock solutions of the (*S*)- and (*R*)- **2** (0.93 mg/mL) in water were prepared in separate 25-mL flasks. The 0.50 mL aliquots of the poly-**1**-HCl solution (2.0 mg/mL) were transferred to seven 1-mL flasks equipped with stopcocks. Aliquots of the stock solutions of (*S*)- and (*R*)-**2** were then placed in the flasks so that the percent ee of the mixtures (*S*-rich) was 5, 10, 20, 40, 60, 80 and 100, and the solutions were finally diluted with water to maintain the poly-**1**-HCl concentration at 1 mg/mL. After mixing the solutions, the CD and absorption spectra were measured for each flask (Figure 2B, inset).

**Preparation of Liquid Crystal Samples for Polarized Microscopy Studies.** The concentrated poly-**1**-HCl (5 mg) solutions in water (10, 20, 30 and 40 wt. %; (weight of total polymer) / [(weight of total polymer) + (weight of water)]) were prepared in separate 2-mL test tubes, for the nematic LC poly-**1**-HCl. After the polymers were completely dissolved to give clear and homogeneous solutions, the solutions were transferred to a 1.0-mm (i.d.) glass capillary with a pipet and the ends were sealed. The cholesteric solutions were prepared in the same way using a 20 wt. % poly-**1**-HCl solution in water in the presence of appropriate amounts of (*S*)-**2** (from 0.0005 to 0.3 equiv.) or 0.1 equiv. nonracemic **2** (from 0.05 to 75 % ee). The samples were left at ambient temperature (20–25 °C) for an hour or days until stable fingerprint textures were obtained. The fingerprint textures showing the retardation lines for the cholesteric LCs were observed using a NIKON E600POL polarized microscope. The fingerprint spacings, which are equal to half of the cholesteric helical pitch, were measured by

comparing it to a photograph of a standard microscopic ruler.

## References

1. Yashima, E.; Maeda, Y.; Matsushima, T.; Okamoto, Y. *Chirality* **1997**, *9*, 593-600.
2. Maeda, K.; Morino, K.; Okamoto, Y.; Sato, T.; Yashima, E. *J. Am. Chem. Soc.* **2004**, *126*, 4329-4342.
3. Connors, K. A. *Binding Constants*; John Wiley: New York, 1987.

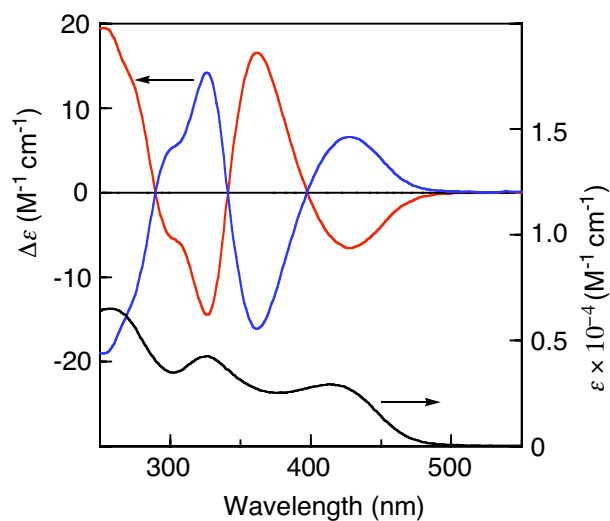

**Figure S-1.** One-handed helicity induction in poly-**1**-HCl in water. Shown are the CD spectra of poly-**1**-HCl with (*S*)- (blue line) and (*R*)-**2** (red line) and absorption spectrum of poly-**1**-HCl with (*S*)-**2** (black line) in water. Molar ratio of (*S*)- or (*R*)-**2** to the monomeric units of poly-**1**-HCl is 0.5.
